# Supplementary material for: Coupling MAR (Modèle Atmosphérique Régional) with PISM (Parallel Ice Sheet Model) mitigates the positive melt–elevation feedback
Source: Copernicus journal article supplement (doi:10.5194/tc-18-633-2024), 2024-02-12
Supplement: Supplementary file 1 [file tc-18-633-2024-supplement.pdf]

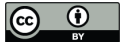

*Supplement of*

## **Coupling MAR (Modèle Atmosphérique Régional) with PISM (Parallel Ice Sheet Model) mitigates the positive melt–elevation feedback**

**Alison Delhasse et al.**

*Correspondence to:* Alison Delhasse ([alison.delhasse@uliege.be](mailto:alison.delhasse@uliege.be))

The copyright of individual parts of the supplement might differ from the article licence.

| Random years (2091-2100) sampled until 2200 |               |             |               |             |               |             |               |
|---------------------------------------------|---------------|-------------|---------------|-------------|---------------|-------------|---------------|
| Runned year                                 | Original year | Runned year | Original year | Runned year | Original year | Runned year | Original year |
| <b>2101</b>                                 | 2096          | <b>2126</b> | 2091          | <b>2151</b> | 2097          | <b>2176</b> | 2095          |
| <b>2102</b>                                 | 2091          | <b>2127</b> | 2097          | <b>2152</b> | 2097          | <b>2177</b> | 2091          |
| <b>2103</b>                                 | 2095          | <b>2128</b> | 2095          | <b>2153</b> | 2097          | <b>2178</b> | 2099          |
| <b>2104</b>                                 | 2094          | <b>2129</b> | 2093          | <b>2154</b> | 2099          | <b>2179</b> | 2093          |
| <b>2105</b>                                 | 2098          | <b>2130</b> | 2096          | <b>2155</b> | 2091          | <b>2180</b> | 2095          |
| <b>2106</b>                                 | 2098          | <b>2131</b> | 2100          | <b>2156</b> | 2091          | <b>2181</b> | 2098          |
| <b>2107</b>                                 | 2098          | <b>2132</b> | 2091          | <b>2157</b> | 2096          | <b>2182</b> | 2099          |
| <b>2108</b>                                 | 2095          | <b>2133</b> | 2098          | <b>2158</b> | 2093          | <b>2183</b> | 2092          |
| <b>2109</b>                                 | 2100          | <b>2134</b> | 2095          | <b>2159</b> | 2096          | <b>2184</b> | 2096          |
| <b>2110</b>                                 | 2092          | <b>2135</b> | 2094          | <b>2160</b> | 2095          | <b>2185</b> | 2098          |
| <b>2111</b>                                 | 2091          | <b>2136</b> | 2095          | <b>2161</b> | 2094          | <b>2186</b> | 2093          |
| <b>2112</b>                                 | 2096          | <b>2137</b> | 2094          | <b>2162</b> | 2096          | <b>2187</b> | 2097          |
| <b>2113</b>                                 | 2099          | <b>2138</b> | 2092          | <b>2163</b> | 2100          | <b>2188</b> | 2093          |
| <b>2114</b>                                 | 2091          | <b>2139</b> | 2091          | <b>2164</b> | 2092          | <b>2189</b> | 2098          |
| <b>2115</b>                                 | 2093          | <b>2140</b> | 2093          | <b>2165</b> | 2093          | <b>2190</b> | 2093          |
| <b>2116</b>                                 | 2099          | <b>2141</b> | 2095          | <b>2166</b> | 2098          | <b>2191</b> | 2099          |
| <b>2117</b>                                 | 2100          | <b>2142</b> | 2093          | <b>2167</b> | 2091          | <b>2192</b> | 2091          |
| <b>2118</b>                                 | 2092          | <b>2143</b> | 2099          | <b>2168</b> | 2092          | <b>2193</b> | 2099          |
| <b>2119</b>                                 | 2094          | <b>2144</b> | 2093          | <b>2169</b> | 2098          | <b>2194</b> | 2098          |
| <b>2120</b>                                 | 2092          | <b>2145</b> | 2094          | <b>2170</b> | 2094          | <b>2195</b> | 2095          |
| <b>2121</b>                                 | 2098          | <b>2146</b> | 2092          | <b>2171</b> | 2093          | <b>2196</b> | 2091          |
| <b>2122</b>                                 | 2100          | <b>2147</b> | 2092          | <b>2172</b> | 2097          | <b>2197</b> | 2096          |
| <b>2123</b>                                 | 2099          | <b>2148</b> | 2093          | <b>2173</b> | 2096          | <b>2198</b> | 2096          |
| <b>2124</b>                                 | 2091          | <b>2149</b> | 2095          | <b>2174</b> | 2092          | <b>2199</b> | 2095          |
| <b>2125</b>                                 | 2095          | <b>2150</b> | 2097          | <b>2175</b> | 2092          | <b>2200</b> | 2094          |

**Table S1.** Random years from CESM2 (2091-2200) sampled until 2200 to extend the large-scale forcing field for MAR.

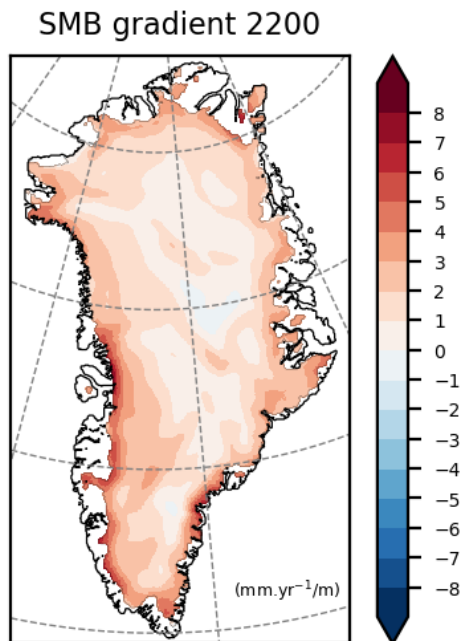

**Figure S1.** Surface mass balance (SMB) gradients ( $mm.yr^{-1}/m$ ) in 2200 as calculated by the offline correction (Franco et al., 2012) over the PISM-4.5 km grid and considering the SMB and surface elevation from the 9 nearest grid-cells of the MAR-25 km grid.

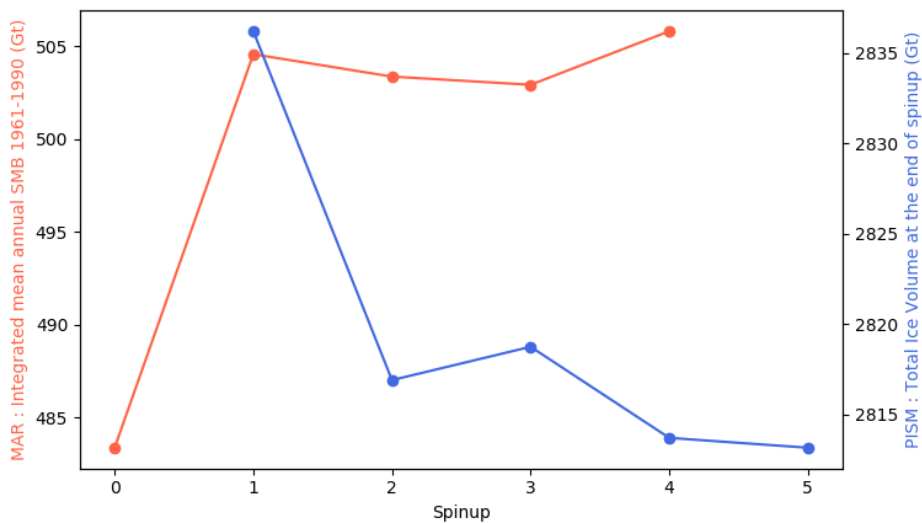

**Figure S2.** Spinup simulations results of SMB in red (MAR), and of MB in blue (PISM).

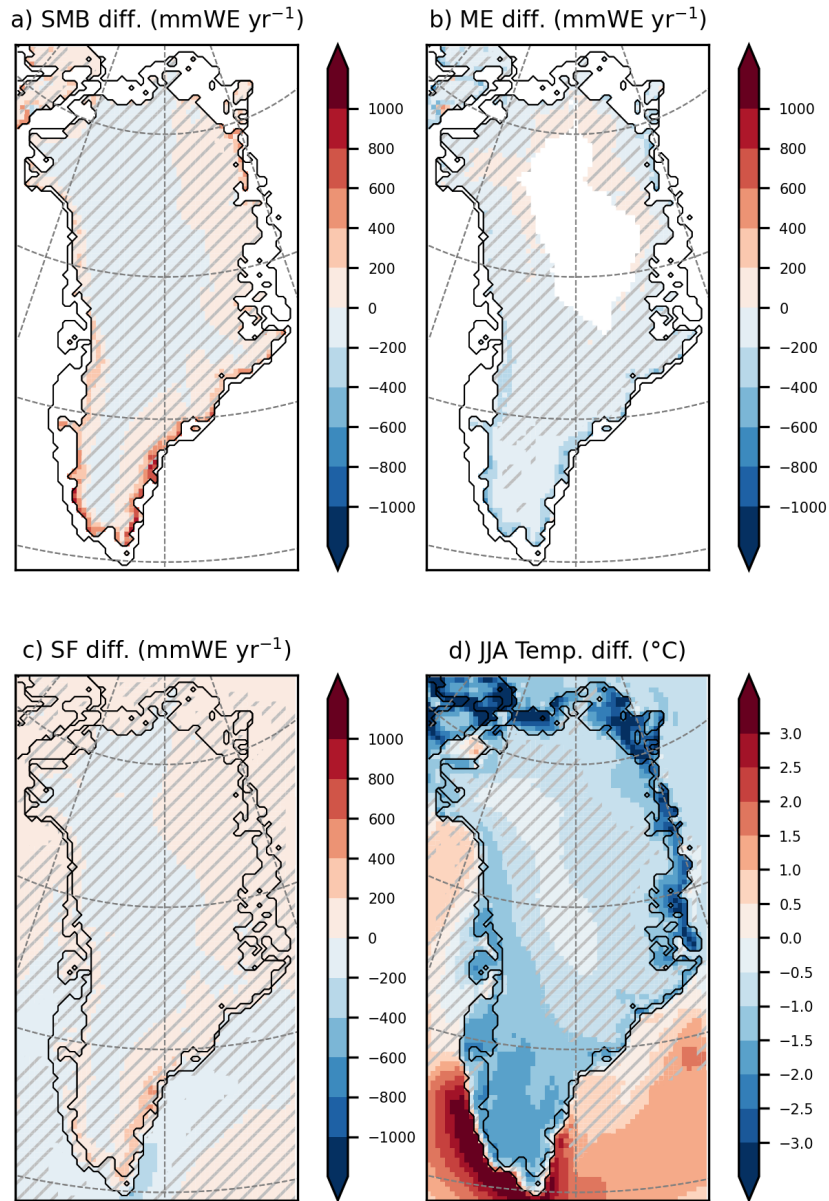

**Figure S3.** Evaluation of MAR-CESM2 compare to MAR-ERA5 over the reference period 1961-1990 with the initialised topography from the coupling between MAR and PISM through differences of the 4 main variables: a) the surface mass balance (SMB,  $\text{mmWE yr}^{-1}$ ), b) melt (ME,  $\text{mmWE yr}^{-1}$ ), c) snowfall (SF,  $\text{mmWE yr}^{-1}$ ) and d) summer temperatures (JJA Temp.,  $^{\circ}\text{C}$ ). Non-significant (smaller than the inter-annual variability) differences are hatched.

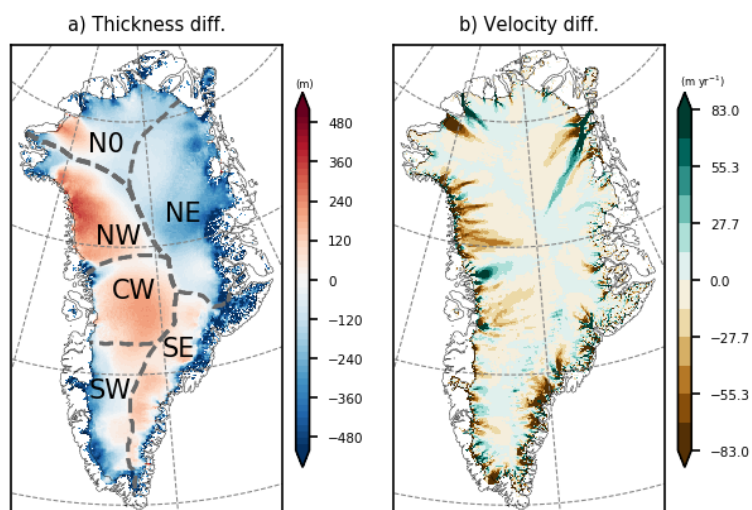

**Figure S4.** Difference of observational data sets - model spinup for a) thickness and b) velocity. For the ice thickness observation, the BedMachineV3 data set (Morlighem et al., 2017) was used. For spinup and observational data set only values with thicknesses  $\geq 1$  m were considered to display the thickness differences and calculate the root mean square error (RMSE) of 224.02 m. The differences of the surface velocities are given by comparing the model spinup to the observational data set (Joughin et al., 2018) with velocity fields averaged over the years 1995–2015. The RMSE for the velocity fields yields  $113.53 \text{ m yr}^{-1}$ . Basins are adjusted following Rignot and Mouginot (2012)

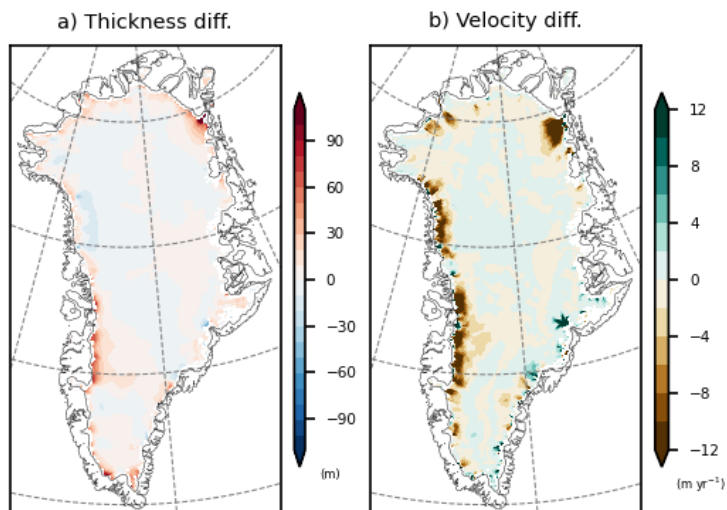

**Figure S5.** Differences in the year 2200 of MAR-PISM 2-way coupling (MAPI-2w) minus 1-way experiment (MAPI-1w) for a) thickness (m) and b) surface velocities ( $\text{m yr}^{-1}$ ).

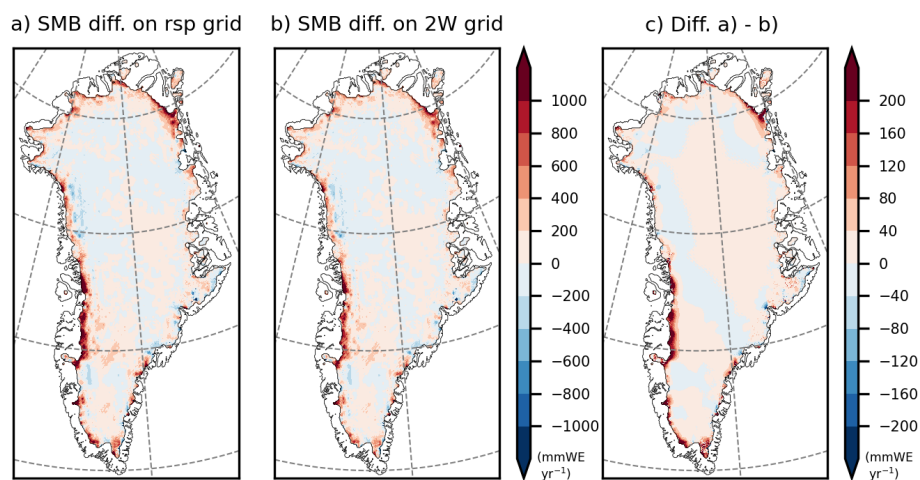

**Figure S6.** a) SMB differences in 2171-2200 between MAPI-1w and MAPI-2w interpolated on their respective PISM topography ( $\text{mmWE yr}^{-1}$ ). b) Same as a) but both interpolated on the same topography of PISM from MAPI-2w. c) Differences between a) and b).

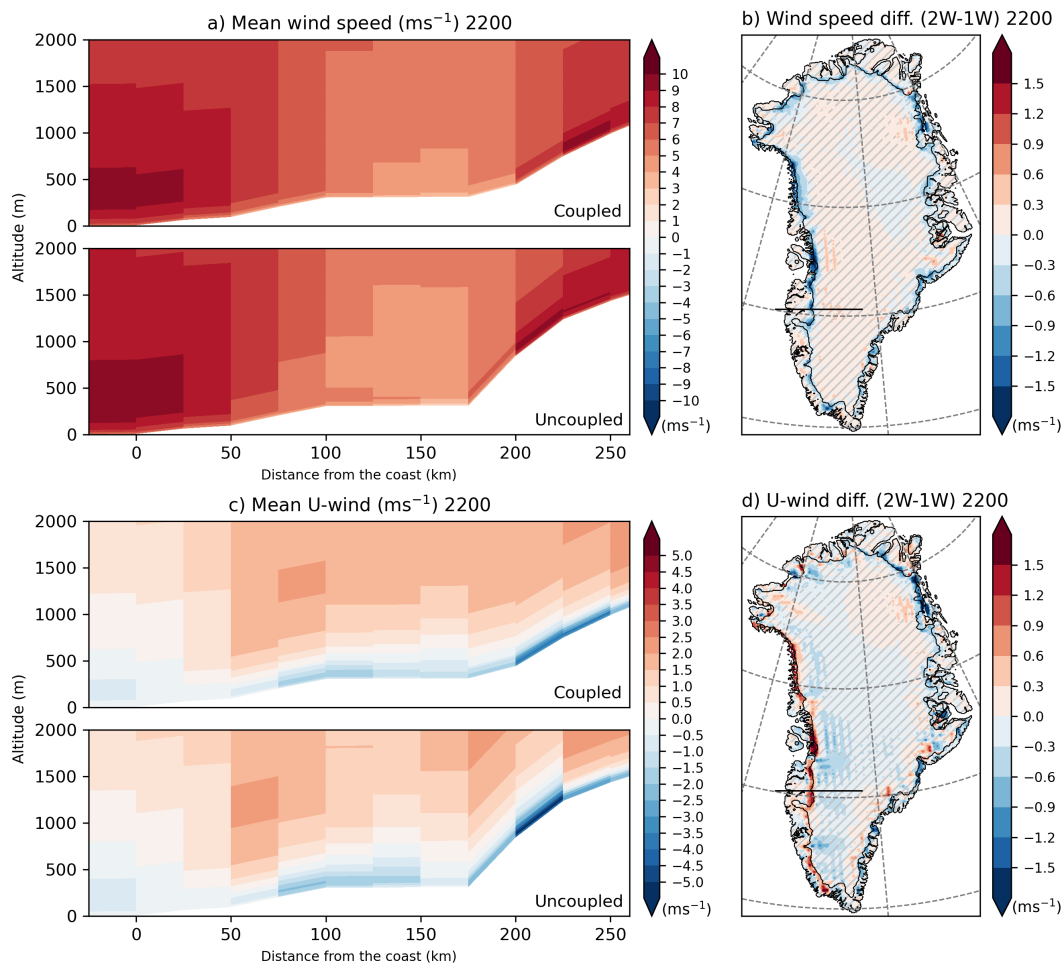

**Figure S7.** a) Cross sections along 66.64–67.35 ° N of mean wind speed (ms<sup>-1</sup>) of Greenland in 2200. Upper cross-sections are represented over the coupled-topography of MAR in MAPI-2w experiment (coupled). Lower cross-sections are represented over the uncoupled-topography of MAR in MAPI-0w or -1w experiment (uncoupled). b) Wind speed differences (ms<sup>-1</sup>) between MAPI-1w and MAPI-2w experiments in 2200. Non-significant differences (lower than the interannual variability over 2171 – 2200) are hatched. The black line situates the cross section in a). c) and d) are the same than a) and b) for the U-wind component (west-east, positive eastward, ms<sup>-1</sup>).

## References

- Franco, B., Fettweis, X., Lang, C., and Erpicum, M.: Impact of spatial resolution on the modelling of the Greenland ice sheet surface mass balance between 1990–2010, using the regional climate model MAR, *The Cryosphere*, 6, 695–711, <https://doi.org/10.5194/tc-6-695-2012>, 2012.
- 5 Joughin, I., Smith, B. E., and Howat, I. M.: A complete map of Greenland ice velocity derived from satellite data collected over 20 years, *Journal of Glaciology*, 64, 1–11, <https://doi.org/10.1017/jog.2017.73>, 2018.
- Morlighem, M., Williams, C. N., Rignot, E., An, L., Arndt, J. E., Bamber, J. L., Catania, G., Chauché, N., Dowdeswell, J. A., Dorschel, B., Fenty, I., Hogan, K., Howat, I., Hubbard, A., Jakobsson, M., Jordan, T. M., Kjeldsen, K. K., Millan, R., Mayer, L., Mouginot, J., Noël, B. P. Y., O’Cofaigh, C., Palmer, S., Rysgaard, S., Seroussi, H., Siegert, M. J., Slabon, P., Straneo, F., van den Broeke, M. R., Weinrebe, W.,
- 10 Wood, M., and Zinglensen, K. B.: BedMachine v3: complete bed topography and ocean bathymetry mapping of Greenland from multibeam echo sounding combined with mass conservation, *Geophysical Research Letters*, 44, 11–051, <https://doi.org/10.1002/2017GL074954>, 2017.
- Rignot, E. and Mouginot, J.: Ice flow in Greenland for the international polar year 2008–2009, *Geophysical Research Letters*, 39, <https://doi.org/10.1029/2012GL051634>, 2012.
